# Supplementary material for: Ciliate mitoribosome illuminates evolutionary steps of mitochondrial translation
Source: eLife journal article supplement (doi:10.7554/elife.59264), 2020-06-18
Supplement: supp1 [file elife-59264-supp1-v2.pdf]

## Supplementary File 1. Cryo-EM data collection, refinement and validation statistics

|                                                  | Consensus map | LSU mask    | SSU mask    | CP mask     | L7/L12 mask | Head mask   | Back protuberance mask |
|--------------------------------------------------|---------------|-------------|-------------|-------------|-------------|-------------|------------------------|
| <b>Data collection and processing</b>            |               |             |             |             |             |             |                        |
| Magnification                                    | 130000x       | 130000x     | 130000x     | 130000x     | 130000x     | 130000x     | 130000x                |
| Voltage (kV)                                     | 300           | 300         | 300         | 300         | 300         | 300         | 300                    |
| Electron exposure (e-/Å <sup>2</sup> )           | 30            | 30          | 30          | 30          | 30          | 30          | 30                     |
| Defocus range (µm)                               | -0.4 ~ -3.0   | -0.4 ~ -3.0 | -0.4 ~ -3.0 | -0.4 ~ -3.0 | -0.4 ~ -3.0 | -0.4 ~ -3.0 | -0.4 ~ -3.0            |
| Pixel size (Å)                                   | 1.07          | 1.07        | 1.07        | 1.07        | 1.07        | 1.07        | 1.07                   |
| Symmetry imposed                                 | C1            | C1          | C1          | C1          | C1          | C1          | C1                     |
| Initial particle images (no.)                    | 450250        | 450250      | 450250      | 450250      | 450250      | 450250      | 450250                 |
| Final particle images (no.)                      | 99380         | 99380       | 99380       | 99380       | 99380       | 99380       | 99380                  |
| Map resolution (Å)                               | 3.67          | 3.38        | 3.61        | 3.61        | 3.48        | 3.30        | 3.61                   |
| FSC threshold 0.143                              |               |             |             |             |             |             |                        |
| Map resolution range (Å)                         | 3.4~10        | 3.0~10      | 3.2~10      | 3.4~10      | 3.2~10      | 2.9~8       | 3.3~10                 |
| <b>Refinement</b>                                |               |             |             |             |             |             |                        |
| Map sharpening <i>B</i> factor (Å <sup>2</sup> ) | -70           |             |             |             |             |             |                        |
| Model composition                                |               |             |             |             |             |             |                        |
| Non-hydrogen atoms                               | 282876        |             |             |             |             |             |                        |
| Protein residues                                 | 23994         |             |             |             |             |             |                        |
| Ligands                                          | 398           |             |             |             |             |             |                        |
| <i>B</i> factors (Å <sup>2</sup> )               |               |             |             |             |             |             |                        |
| Protein                                          | 98            |             |             |             |             |             |                        |
| Nucleotide                                       | 83            |             |             |             |             |             |                        |
| Ligand                                           | 143           |             |             |             |             |             |                        |
| R.m.s. deviations                                |               |             |             |             |             |             |                        |
| Bond lengths (Å)                                 | 0.009         |             |             |             |             |             |                        |
| Bond angles (°)                                  | 0.948         |             |             |             |             |             |                        |
| Validation                                       |               |             |             |             |             |             |                        |
| MolProbity score                                 | 1.52          |             |             |             |             |             |                        |
| Clashscore                                       | 3.79          |             |             |             |             |             |                        |
| Poor rotamers (%)                                | 0.01          |             |             |             |             |             |                        |
| Ramachandran plot                                |               |             |             |             |             |             |                        |
| Favored (%)                                      | 94.98         |             |             |             |             |             |                        |
| Allowed (%)                                      | 4.99          |             |             |             |             |             |                        |
| Disallowed (%)                                   | 0.03          |             |             |             |             |             |                        |
