# Supplementary material for: Ciliate mitoribosome illuminates evolutionary steps of mitochondrial translation
Source: eLife journal article supplement (doi:10.7554/elife.59264), 2020-06-18
Supplement: supp2 [file elife-59264-supp2-v2.pdf]

## Supplementary File 2: Summary of the mitoribosomal proteins.

| Alias      | Chain ID          | Uniprot Name                                        | ID                         | Full Size | Modeled Residues                     | Comment                                                                          |
|------------|-------------------|-----------------------------------------------------|----------------------------|-----------|--------------------------------------|----------------------------------------------------------------------------------|
| LSU rRNA 1 | Aa                |                                                     | AF396436.1:<br>47156-47433 | 287       | 1-278                                |                                                                                  |
| LSU rRNA 2 | Ab                |                                                     | AF396436.1:<br>44750-47063 | 2314      | 279-1317,<br>1324-1816,<br>1886-2237 | L1 stalk not modeled                                                             |
| uL2m       | Ac                | Ribosomal protein L2                                | Q951B6                     | 262       | 1-262                                |                                                                                  |
| uL3m       | Ad                | 50S ribosomal protein L3                            | Q22HG3                     | 439       | 32-59, 85-439                        |                                                                                  |
| uL4m       | Ae                | 50S ribosomal protein L4                            | I7MGP2                     | 358       | 22-359                               |                                                                                  |
| uL5m       | Af                | Ymf69                                               | Q951A2                     | 68        | 1-68                                 |                                                                                  |
| uL6m       | Ag                | Ymf60                                               | Q951A9                     | 179       | 1-176                                |                                                                                  |
| bL7/12m    | Ah, Ai,<br>Aj, Ak | Ribosomal protein L7/L12<br>Carboxy-terminal domain | Q24IM4                     | 280       | 1-117: 1-61:<br>1-75: 12-116         | Four chains                                                                      |
| bL9m       | Al                | Ribosomal protein L9,<br>Amine-terminal domain      | Q24C33                     | 223       | 12-64                                | Majority missing due to flexible<br>L1 stalk                                     |
| bL10m      | Am                | Ymf74                                               | Q951B5                     | 157       | (-8)-157                             | Additional amino acids at N-<br>terminus modeled as UNK with<br>negative numbers |
| uL11m      | An                | Ribosomal protein L11,<br>Amine-terminal domain     | W7XH77                     | 158       | 1-158                                |                                                                                  |
| uL13m      | Ao                | 50S ribosomal protein L13                           | W7X626                     | 391       | 28-357                               |                                                                                  |
| uL14m      | Ap                | Ribosomal protein L14                               | Q950Y1                     | 119       | 1-119                                |                                                                                  |
| uL15m      | Aq                | Ribosomal protein L15, putative                     | I7MF78                     | 305       | 33-305                               |                                                                                  |
| uL16m      | Ar                | Ribosomal protein L16                               | Q951A0                     | 143       | 1-143                                |                                                                                  |
| bL17m      | As                | 50S ribosomal protein L17                           | A4VE95                     | 237       | 2-237                                |                                                                                  |
| bL19m      | At                | Uncharacterized protein                             | I7M2I9                     | 242       | 1-183                                |                                                                                  |
| bL20m      | Au                | 50S ribosomal protein L20                           | Q235I3                     | 170       | 2-170                                |                                                                                  |
| bL21m      | Av                | 50S ribosomal protein L21                           | I7LVD3                     | 235       | 30-235                               |                                                                                  |
| uL22m      | Aw                | Ribosomal protein L22/L17e                          | Q23CT9                     | 364       | 23-364                               |                                                                                  |
| uL23m      | Ax                | Ribosomal protein<br>L23 putative                   | Q22EY1                     | 138       | 6-138                                |                                                                                  |
| uL24m      | Ay                | 50S ribosomal protein L24                           | Q24C34                     | 234       | 45-234                               |                                                                                  |
| bL25m      | Az                | Uncharacterized protein                             | I7LVZ3                     | 321       | 26-262                               | Contains two domains as<br>observed in alphaproteobacteria.                      |
| bL27m      | AA                | 50S ribosomal protein L27                           | I7M068                     | 237       | 38-213                               |                                                                                  |
| bL28m      | AB                | Ribosomal protein L28                               | I7LU83                     | 289       | 23-286                               |                                                                                  |
| uL29m      | AC                | 39-S ribosomal protein L47                          | Q22W36                     | 307       | 21-304                               | Sequence missannotated as mL47                                                   |
| bL32m      | AD                |                                                     |                            |           | 1-36                                 | No identified sequence                                                           |
| bL33m      | AE                | 50S ribosomal protein L33                           | Q22L35                     | 64        | 6-62                                 |                                                                                  |
| bL35m      | AF                | Uncharacterized protein                             | I7M803                     | 164       | 50-164                               |                                                                                  |
| bL36m      | AG                | Ribosomal protein                                   | W7XH61                     | 93        | 1-38                                 | Zn binding                                                                       |
| mL40       | AH                | Uncharacterized protein                             | I7LT48                     | 199       | 23-199                               |                                                                                  |
| mL41       | AI                | Ribosomal protein L27                               | I7MG40                     | 155       | 11-132                               | Sequence missannotated as<br>bL27m                                               |
| mL43       | AJ                | Ribosomal protein<br>L51/S25/C1-B8 domain           | Q22RG0                     | 179       | 2-179                                |                                                                                  |
| mL46       | AK                | Uncharacterized protein                             | I7LWM6                     | 309       | 66-309                               |                                                                                  |
| mL49       | AL                | Large subunit<br>Ribosomal protein                  | I7MAF1                     | 145       | 1-145                                |                                                                                  |
| mL53       | AM                | Uncharacterized protein                             | Q22KC0                     | 184       | 59-184                               |                                                                                  |
| mL54       | AN                | Uncharacterized protein                             | I7MI39                     | 158       | 40-135                               |                                                                                  |
| mL64       | AO                | Uncharacterized protein                             | Q23ZH7                     | 155       | 1-120                                |                                                                                  |

| Alias      | Chain ID | Uniprot Name                                | ID                     | Full Size | Modeled Residues        | Comment                                                                                                   |
|------------|----------|---------------------------------------------|------------------------|-----------|-------------------------|-----------------------------------------------------------------------------------------------------------|
| mL101      | AP       | Uncharacterized protein                     | I7M3V9                 | 386       | 23-386                  | Helical repeat protein binding partially unfolded H79                                                     |
| mL102      | AQ       | Uncharacterized protein                     | W7WYR3                 | 109       | 60-109                  |                                                                                                           |
| mL103      | AR       | Uncharacterized protein                     | I7MKV5                 | 348       | 62-335                  |                                                                                                           |
| mL104      | AS       | Uncharacterized protein                     | I7LTP6                 | 763       | 24-97, 111-764          | Helical repeat protein binding H42-ES1                                                                    |
| mL105      | AT       | Signal peptide-binding Domain protein       | W7XFS0                 | 299       | 134-299                 | Homolog of bacterial SRP binding protein Ffh                                                              |
| mL106      | AU       | Uncharacterized protein                     | Q23Q81                 | 499       | 21-49                   | Helical repeat protein binding LSU 3'-ES1                                                                 |
| mL107      | AV       | Iron-binding zinc finger CDGSH Type protein | Q22HE3                 | 160       | 22-152                  | FES cluster binding CDGSH motif protein                                                                   |
| Alias      | Chain ID | Uniprot Name                                | ID                     | Full Size | Modeled Residues        | Comment                                                                                                   |
| SSU rRNA 1 | Ba       |                                             | AF396436.1:32623-32833 | 211       | 14-209                  |                                                                                                           |
| SSU rRNA 2 | Bb       |                                             | AF396436.1:32895-34289 | 1395      | 218-1602                |                                                                                                           |
| us2m       | Bc       | Ymf73                                       | Q950X8                 | 159       | 1-159                   |                                                                                                           |
| uS3m       | Bd       | Ymf64                                       | Q951A8                 | 330       | 1-330                   | Constitutes the CTD of bacterial uS3. Assembles together with mS31 and mS92 to produce a full S3 protein. |
| uS4m       | Be       | Ymf76                                       | Q951C0                 | 405       | 1-405                   |                                                                                                           |
| uS5m       | Bf       | 30S ribosomal protein S5                    | I7M4M7                 | 351       | 16-352                  |                                                                                                           |
| bS6m       | Bg       | Ribosomal protein S6                        | I7MHS2                 | 141       | 2-137                   |                                                                                                           |
| uS7m       | Bh       | Ymf63                                       | Q951A4                 | 276       | 1-276                   |                                                                                                           |
| uS9m       | Bi       | Ribosomal protein S9                        | I7M4A2                 | 737       | 23-184, 256-737         |                                                                                                           |
| uS10m      | Bj       | Ymf59                                       | Q951A1                 | 152       | 1-152                   |                                                                                                           |
| uS11m      | Bk       | Ymf61                                       | Q950Z8                 | 238       | 13-238                  |                                                                                                           |
| uS12m      | Bl       | Ribosomal protein S12                       | Q951B3                 | 276       | 5-133                   |                                                                                                           |
| uS13m      | Bm       | Ribosomal protein S13                       | Q951B9                 | 101       | 3-19, 213-230, 240-248  |                                                                                                           |
| uS14m      | Bn       | Ribosomal protein S14                       | Q951B0                 | 196       | 1-101                   |                                                                                                           |
| uS15m      | Bo       | 30S ribosomal protein S15                   | Q22WF3                 | 133       | 18-196                  |                                                                                                           |
| bS16m      | Bp       | 30S ribosomal protein S16                   | I7M3F6                 | 437       | 1-412                   |                                                                                                           |
| uS17m      | Bq       | 30S ribosomal protein S17                   | I7M6C7                 | 205       | 2-112, 119-183          |                                                                                                           |
| bS18m      | Br       | Ribosomal protein S18                       | Q23K82                 | 549       | 27-549                  |                                                                                                           |
| uS19m      | Bs       | Ribosomal protein S19                       | Q951B7                 | 98        | 1-87                    |                                                                                                           |
| bS21m      | Bt       | Uncharacterized protein                     | Q22BA0                 | 102       | 1-102                   |                                                                                                           |
| mS23       | Bu       | Uncharacterized protein                     | Q23YQ0                 | 675       | 1-217, 227-448, 457-583 |                                                                                                           |
| mS26       | Bv       | Uncharacterized protein                     | I7M0P0                 | 579       | 25-334, 425-589         |                                                                                                           |
| mS29       | Bw       | Ribosomal death-associated protein          | Q22RT0                 | 703       | 22-38, 49-110, 121-705  | ATP binding, additional domain compared to <i>H. sapiens</i>                                              |
| mS31       | Bx       | Uncharacterized protein                     | Q23UD3                 | 719       | 182-387, 396-719        | Assembles the uS3m NTD together with uS3m and mS92                                                        |
| mS33       | By       | Uncharacterized protein                     | I7LW04                 | 132       | 2-108                   |                                                                                                           |
| mS34       | Bz       | Uncharacterized protein                     | I7LWU8                 | 147       | 10-132                  |                                                                                                           |
| mS35       | BA       | Ribosomal subunit protein                   | Q23K64                 | 149       | 12-149                  |                                                                                                           |
| mS37       | BB       | Uncharacterized protein                     | I7MMM6                 | 112       | 3-112                   |                                                                                                           |
| mS38       | BC       |                                             |                        |           | 3-37                    | No identified sequence                                                                                    |
| mS41       | BD       | IGR motif protein                           | Q22FZ4                 | 130       | 24-130                  |                                                                                                           |
| mS45       | BE       | Uncharacterized protein                     | Q23DN6                 | 464       | 18-464                  |                                                                                                           |

| Alias | Chain ID | Uniprot Name                       | ID     | Full Size | Modeled Residues      | Comment                                                                                                                                                                                                               |
|-------|----------|------------------------------------|--------|-----------|-----------------------|-----------------------------------------------------------------------------------------------------------------------------------------------------------------------------------------------------------------------|
| mS75  | BF       |                                    |        |           | 1-23                  | Charge compensating peptide in SSU head, no identified sequence                                                                                                                                                       |
| mS76  | BG       | Uncharacterized protein            | Q24G80 | 182       | 19-182                |                                                                                                                                                                                                                       |
| mS77  | BH       |                                    |        |           | 1-63                  | No identified sequence, possible fragment                                                                                                                                                                             |
| mS47  | BI       | Enoyl-CoA Hydratase/isomerase      | Q22P47 | 1451      | 24-1019, 1094-1510    | rRNA binding protein domain with putative lipase fold interacting with 5' SSU rRNA. The remaining protein sequence has minimal tertiary structure but forms interactions with most proteins in the back protuberance. |
| mS78  | BJ       | Uncharacterized protein            | I7M7B1 | 1539      | 25-1539               | Large scaffolding protein connecting SSU head, back protuberance and body extension. Contains a helical repeat domain not binding rRNA                                                                                |
| mS79  | BK       | Uncharacterized protein            | Q23DG3 | 267       | 1-267                 |                                                                                                                                                                                                                       |
| mS80  | BL       | SelR domain protein                | Q22W57 | 310       | 123-303               | Zn binding methionine oxidoreductase                                                                                                                                                                                  |
| mS81  | BM       | Uncharacterized protein            | Q24E31 | 355       | 72-335                |                                                                                                                                                                                                                       |
| mS82  | BN       | Uncharacterized protein            | Q22GF7 | 283       | 10-283                |                                                                                                                                                                                                                       |
| mS83  | BO       | Uncharacterized protein            | Q22N51 | 1338      | 107-285               | Helical repeat protein in back protuberance. Continues with extremely poor density. Density suggests additional flexible domains                                                                                      |
| mS84  | BP       |                                    |        |           | 1-100                 | No identified sequence                                                                                                                                                                                                |
| mS85  | BQ       | Uncharacterized protein            | Q22UP3 | 1032      | 39-553, 578-684       |                                                                                                                                                                                                                       |
| mS86  | BR       | Iron donor protein CyaY            | Q240K3 | 143       | 1-143                 | Fratraxis like fold, no Fe bound.                                                                                                                                                                                     |
| mS87  | BS       | Uncharacterized protein            | A4VCP7 | 1086      | 646-841, 850-1086     |                                                                                                                                                                                                                       |
| mS88  | BT       |                                    |        |           | 1-299                 | No identified sequence                                                                                                                                                                                                |
| mS89  | BU       | Uncharacterized protein            | Q22EB6 | 439       | 29-337                |                                                                                                                                                                                                                       |
| mS90  | BV       | Uncharacterized protein (Fragment) | Q24HL0 | 401       | 79-422                |                                                                                                                                                                                                                       |
| mS91  | BW       |                                    |        |           | 1-286                 | No identified sequence. Helical repeat protein in back protuberance.                                                                                                                                                  |
| mS92  | BX       | Ribosomal protein S3               | Q951B8 | 151       | 1-62, 75-118, 125-151 | Part of uS3m together with mS31                                                                                                                                                                                       |
| mS93  | BY       | mTERF protein                      | I7LUK3 | 411       | 17-387                | Mitochondrial transcription termination factor MTERF4                                                                                                                                                                 |

Components of the *T. thermophila* mitochondrial ribosome. Conserved proteins in blue, shared mitoribosomal proteins in red, specific mitoribosomal proteins in yellow. ID corresponds to Uniprot identifier for proteins and GenBank accession number and range for rRNA.
